# Supplementary material
Source: PubMed Central journal article supplement (PMC4962636)
Supplement: IAI.00324-16_zii999091769so1.pdf [file IAI.00324-16_zii999091769so1.pdf]

## **Explanations for the Supplementary Files**

**DATASET S1. XLS File. Accession of LRRs in *Yersinia*.**

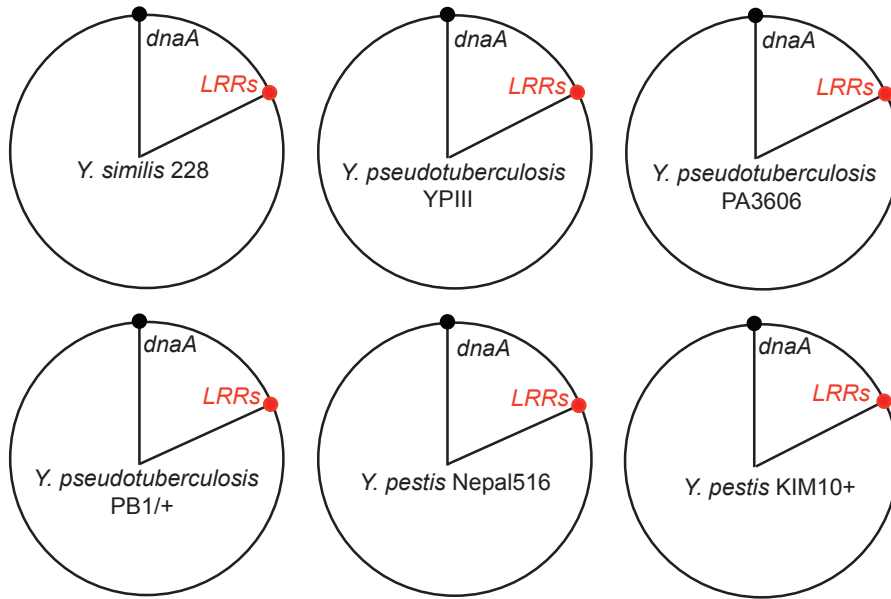

**Fig. S1 . PDF File. The *LRR1* loci in different *Yersinia* chromosomes.** Each *Yersinia* chromosome was represented as a circle with the *dnaA* as the reference replicate origin, which was considered to be conserved among bacteria. The *dnaA* locus was indicated and used as the reference, apart from which *LRR* locus (in red) could be measured by the included angle. The angles included by each *LRR* locus and *dnaA* are nearly identical, indicating the conservation of the *LRR* loci.

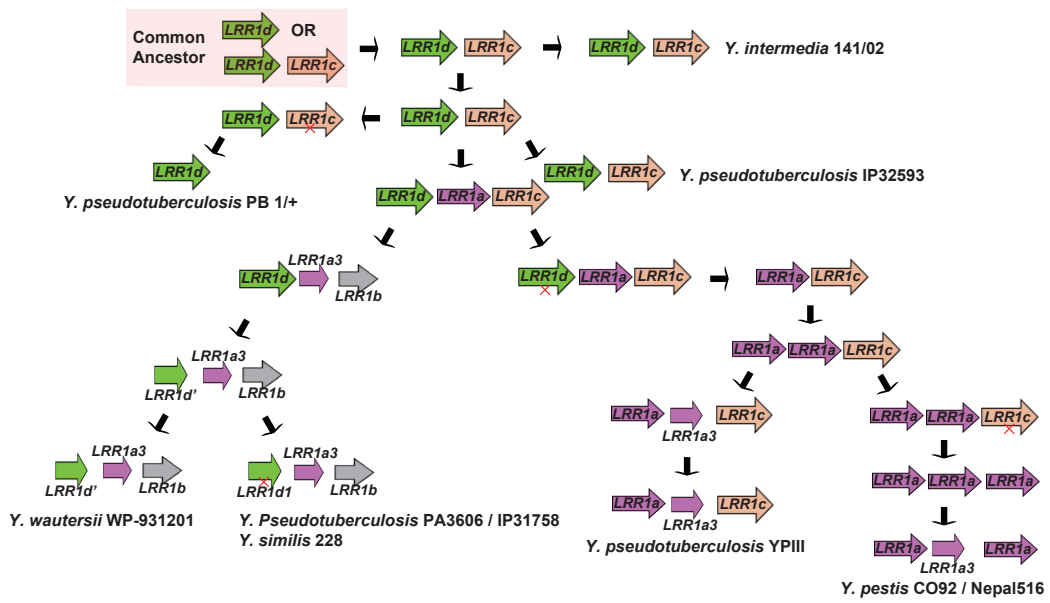

**Fig. S2 . PDF File. The diagram of evolutionary history of *Yersinia* LRR1 genes.** Genes of different subgroups were shown in different color. Pseudo-genes were marked with 'X's.

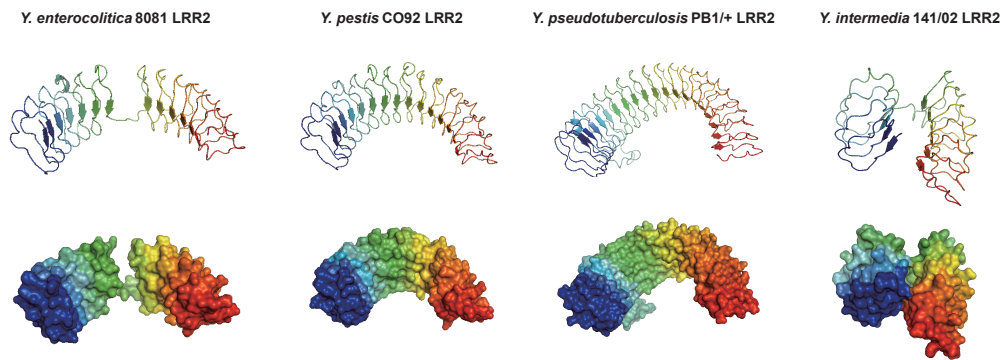

**Fig. S3 . PDF File. The tertiary structure of representative *Yersinia* LRR2 proteins.** The structure was shown in cartoon (upper) and surface mode (lower).

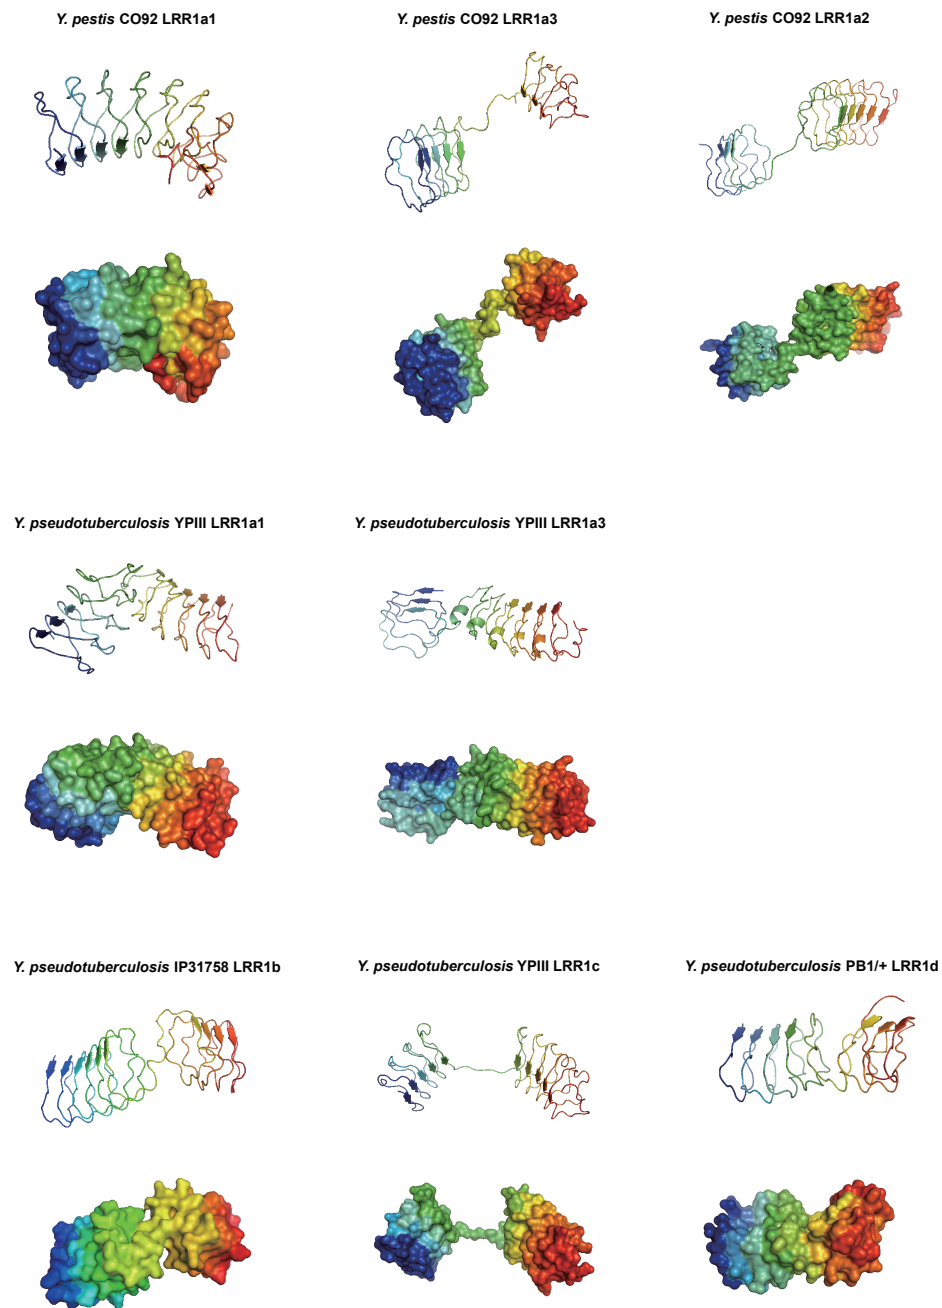

**Fig. S4 .PDF File. The tertiary structure of representative *Yersinia* LRR1 proteins.** The structure was shown in cartoon (upper) and surface mode (lower).
